# Supplementary material
Source: HighWire-hosted journal article supplement (https://svn.smart01.highwire.org/content/9/3/295)

SUPPLEMENTARY MATERIAL ONLINE

*Retinal artery/arteriole occlusion risks after endovascular treatment for unruptured intracranial aneurysm*

| Contents                                                                                                                                                                                                                                                | Page  |
|---------------------------------------------------------------------------------------------------------------------------------------------------------------------------------------------------------------------------------------------------------|-------|
| Supplementary Methods                                                                                                                                                                                                                                   | 2-3   |
| Supplementary Table 1. Definitions and codes used for defining medical conditions, comorbidities, drug treatments, and procedures                                                                                                                       | 4     |
| Supplementary Table 2. Characteristics of patients with retinal artery occlusion after endovascular treatment for unruptured intracranial aneurysm                                                                                                      | 5-6   |
| Supplementary Table 3. Annual new cases and incidence rate of retinal artery occlusion in Korean general population                                                                                                                                     | 7     |
| Supplementary Table 4. Comparison of the incidence rate and standardized incidence ratio of retinal artery occlusion in Korean patients with unruptured intracranial aneurysm                                                                           | 8-9   |
| Supplementary Table 5. Case reports and review of the literature on retinal artery occlusion after the treatment of unruptured intracranial aneurysm                                                                                                    | 10-11 |
| Supplementary Figure 1. Incidence of retinal artery occlusion after the diagnosis of unruptured intracranial aneurysm in untreated patients (A), patients treated with microsurgical clipping (B), and patients treated with endovascular treatment (C) | 12    |
| Supplementary Figure 2. Representative cases of retinal artery occlusion after endovascular treatment procedure for unruptured intracranial aneurysm                                                                                                    | 13    |

## Supplementary Methods

### *Data source and availability of the nationwide population-based cohort*

This study was a retrospective analysis of the National Health Claims Database established by the Health Insurance Review and Assessment (HIRA) service in Korea. The majority (97%) of the Korean population mandatorily subscribes to the National Health Insurance Service, which is a single insurer managed by the Korean government, with the remaining 3% categorized as medical aid individuals. All raw data can be accessed via the HIRA Healthcare Bigdata Hub server. The application of the claims data submitted through the HIRA Healthcare Bigdata Hub homepage (<https://opendata.hira.or.kr/home.do>) is reviewed by the deliberative committee of research support, and once approved, raw data are provided to the authorized researcher at a fee. After obtaining permission, data were analyzed using remote access to the HIRA server. The entire dataset can be handled only through a connection to the HIRA server, and the analyzed data can be exported with HIRA approval.

### *Data collection for the hospital-based cohort*

The data collected for each patient included the following at baseline: sex, age, date and type of treatment for aneurysm, antiplatelet and anticoagulant medication, presence of hypertension, diabetes, dyslipidemia, chronic kidney disease, and all complications related to endovascular treatment, including intraoperative bleeding, carotid artery dissection, intraoperative thrombus, and post-procedural complications (e.g., transient ischemic attack, ischemic stroke, permanent neurologic deficit, or hemorrhagic complications). Digital subtraction angiography (DSA), computed tomography angiography (CTA), and magnetic resonance imaging before and after the procedure were performed in all patients to confirm the presence of atherosclerosis, carotid artery dissection, and diffusion restriction after treatment. DSA and CTA were performed to evaluate the angioarchitecture of the aneurysm using the Philips Biplane Angiographic System.

### *Routine treatment protocols for endovascular treatment*

All treatment procedures were performed with the patient under general anesthesia. The routine antiplatelet preparations prescribed for endovascular treatment (EVT) of the UIA are per os aspirin (100 mg/day) and clopidogrel (75 mg/day) for at least 5 days before EVT. If the daily regimens were not followed, aspirin and clopidogrel were administered at a loading dose of 300 mg. Systemic heparin was administered after arterial puncture. In line with our embolization protocol, 2,000–3,000 IU of heparin was administered as an intravenous bolus injection, followed by an additional dose of 1,000 IU/hour without routine monitoring of the activated coagulation time and activated partial thromboplastin time.

Supplementary Tables

Supplementary Table 1. Definitions and codes used to define the medical conditions, comorbidities, drug treatments, and procedures

|                                                  | Definitions                                                                                                   | Codes or conditions                                                                                                           |
|--------------------------------------------------|---------------------------------------------------------------------------------------------------------------|-------------------------------------------------------------------------------------------------------------------------------|
| <b>Medical conditions</b>                        |                                                                                                               |                                                                                                                               |
| Unruptured intracranial aneurysm                 | Defined from diagnosis*                                                                                       | ICD-10: I671                                                                                                                  |
| Central retinal artery occlusion                 | Defined from diagnoses*                                                                                       | ICD-10: H341                                                                                                                  |
| Branch retinal artery occlusion                  | Defined from diagnoses*                                                                                       | ICD-10: H342                                                                                                                  |
| Hypertension                                     | Defined from diagnosis*                                                                                       | ICD-10: I10, I11, I12, I13, I15                                                                                               |
| Diabetes mellitus                                | Defined from diagnosis*                                                                                       | ICD-10: E10, E11, E12, E13, E14                                                                                               |
| Dyslipidemia                                     | Defined from diagnosis*                                                                                       | ICD-10: E78                                                                                                                   |
| Transient ischemic attack                        | Defined from diagnosis*                                                                                       | ICD-10: G45                                                                                                                   |
| Ischemic stroke                                  | Defined from diagnosis*                                                                                       | ICD-10: I63, I64                                                                                                              |
| Hemorrhagic stroke                               | Defined from diagnosis*                                                                                       | ICD-10: I60, I61, I62                                                                                                         |
| Myocardial infarction                            | Defined from diagnosis*                                                                                       | ICD-10: I21, I22, I25.2                                                                                                       |
| Chronic kidney disease                           | Defined from diagnosis*                                                                                       | ICD-10: N18, N19                                                                                                              |
| Hyperthyroidism                                  | Defined from diagnosis*                                                                                       | ICD-10: E05                                                                                                                   |
| Hypothyroidism                                   | Defined from diagnosis*                                                                                       | ICD-10: E03                                                                                                                   |
| Chronic liver disease                            | Defined from diagnosis*                                                                                       | ICD-10: B18, K70, K71, K72, K73, K74, K76.1                                                                                   |
| Chronic obstructive pulmonary disease            | Defined from diagnosis*                                                                                       | ICD-10: J42, J43(except J43.0), J44                                                                                           |
| <b>Drug treatment (available in South Korea)</b> |                                                                                                               |                                                                                                                               |
| Aspirin                                          |                                                                                                               | Aspirin                                                                                                                       |
| Warfarin                                         |                                                                                                               | Warfarin                                                                                                                      |
| NOAC                                             |                                                                                                               | Rivaroxaban, Dabigatran, Apixaban, Edoxaban, Enoxaparin, Fondaparinux                                                         |
| Antiplatelet                                     |                                                                                                               | Clopidogrel, Ticagrelor, Prasugrel, Dipyridamole, Ticlopidine, Eptifibatide, Cilostazole                                      |
| <b>Procedures</b>                                |                                                                                                               |                                                                                                                               |
| Microsurgical clipping                           | Defined from admission diagnosis of unruptured intracranial aneurysm plus claims for microsurgical procedures | ICD-10: I671<br>Claim codes: S4641 (Cerebral aneurysm-clipping simple) or S4642 (Cerebral aneurysm-clipping complex)          |
| Endovascular treatment                           | Defined from admission diagnosis of unruptured intracranial aneurysm plus claims for endovascular treatment   | ICD-10: I671<br>Claim codes: M1661 (Embolization-cerebral/aneurysm/assisted) or M1662 (Embolization-cerebral/aneurysm/others) |

\*To ensure accuracy, comorbidities were established based on one inpatient or two outpatient records with ICD-10 codes in the database. NOAC, non-vitamin K antagonist oral anticoagulant; ICD-10, International Classification of Diseases-10th edition.

**Supplementary Table 2.** Characteristics of patients with retinal artery occlusion (RAO) after endovascular treatment for unruptured intracranial aneurysm

|                                    |                                   | Early RAO | Delayed RAO |
|------------------------------------|-----------------------------------|-----------|-------------|
| <b>Number of patients with RAO</b> |                                   |           |             |
|                                    | CRAO                              | 5 (20%)   | 6 (24%)     |
|                                    | BRAO                              | 20 (80%)  | 19 (76%)    |
| <b>Age group</b>                   |                                   |           |             |
|                                    | < 40                              | 1 (4%)    | 2 (8%)      |
|                                    | 40-64                             | 16 (64%)  | 12 (48%)    |
|                                    | 65-74                             | 6 (24%)   | 9 (36%)     |
|                                    | ≥ 75                              | 2 (8%)    | 2 (8%)      |
| <b>Sex</b>                         |                                   |           |             |
|                                    | Male                              | 8 (32%)   | 13 (52%)    |
|                                    | Female                            | 17 (68%)  | 12 (48%)    |
| <b>Socioeconomic status*</b>       |                                   |           |             |
|                                    | Korean National Health Insurance  | 22 (88%)  | 25 (100%)   |
|                                    | Medical Assistance program Type 1 | 3 (12%)   | 0           |
|                                    | Others                            | 0         | 0           |
| <b>Residence</b>                   |                                   |           |             |
|                                    | Urban                             | 14 (56%)  | 12 (48%)    |
|                                    | Rural                             | 11 (44%)  | 13 (52%)    |
| <b>Comorbidities</b>               |                                   |           |             |
|                                    | Hypertension                      | 16 (64%)  | 14 (56%)    |
|                                    | Diabetes                          | 4 (16%)   | 6 (24%)     |
|                                    | Dyslipidemia                      | 18 (72%)  | 13 (52%)    |
|                                    | Transient ischemic attack         | 1 (4%)    | 0 (0%)      |
|                                    | Ischemic stroke                   | 3 (12%)   | 3 (12%)     |
|                                    | Hemorrhagic stroke                | 1 (4%)    | 1 (4%)      |
|                                    | Myocardial infarction             | 0         | 0           |
|                                    | Chronic kidney disease            | 3 (12%)   | 1 (4%)      |
|                                    | Malignancy                        | 2 (8%)    | 0           |
|                                    | Hyperthyroidism                   | 0         | 0           |
|                                    | Hypothyroidism                    | 4 (16%)   | 2 (8%)      |
|                                    | Chronic liver disease             | 4 (16%)   | 4 (16%)     |
|                                    | COPD                              | 1 (4%)    | 1 (4%)      |
| <b>CCI</b>                         |                                   |           |             |
|                                    | 0                                 | 10 (40%)  | 14 (56%)    |
|                                    | 1                                 | 5 (20%)   | 3 (12%)     |
|                                    | ≥ 2                               | 10 (40%)  | 8 (32%)     |
| <b>Drugs</b>                       |                                   |           |             |

|        |                       |          |          |
|--------|-----------------------|----------|----------|
|        | Aspirin               | 3 (12%)  | 9 (36%)  |
|        | Warfarin              | 0        | 0        |
|        | NOAC                  | 1 (4%)   | 0        |
|        | Antiplatelet          | 6 (24%)  | 7 (28%)  |
| Device |                       |          |          |
|        | Balloon microcatheter | 3 (12%)  | 1 (4%)   |
|        | Stent assisted        | 17 (68%) | 16 (64%) |
|        | Flow diverter         | 1 (4%)   | 0        |

\*Socioeconomic status was categorized based on the type of medical insurance received. People who cannot afford 30% of their total medical expenses, which are self-funded Under Korean National Health Insurance, are covered by the Medical Assistance Program.

**Abbreviation;** CRAO, central retinal artery occlusion; BRAO, branch retinal artery occlusion; COPD, chronic obstructive pulmonary disease; CCI, Charlson Comorbidity Index; NOAC, non-vitamin K antagonist oral anticoagulant.

**Supplementary Table 3.** Annual new cases and the incidence rate of retinal artery occlusion in the general population (2018–2019)

| Age group | Average annual new cases |       | Average annual population |          | Average annual incidence rate* |       |
|-----------|--------------------------|-------|---------------------------|----------|--------------------------------|-------|
|           | Men                      | Women | Men                       | Women    | Men                            | Women |
| 0-4       | 1                        | 0.5   | 1009115                   | 958561   | 0.10                           | 0.05  |
| 5-9       | 0                        | 2.5   | 1198020                   | 1133733  | 0.00                           | 0.22  |
| 10-14     | 3.5                      | 1     | 1198873                   | 1122685  | 0.29                           | 0.09  |
| 15-19     | 11.5                     | 5     | 1458324                   | 1340336  | 0.79                           | 0.37  |
| 20-24     | 8.5                      | 11.5  | 1784884                   | 1610222  | 0.48                           | 0.71  |
| 25-29     | 22.5                     | 23.5  | 1786715                   | 1602706  | 1.26                           | 1.47  |
| 30-34     | 31                       | 20    | 1644455                   | 1544700  | 1.89                           | 1.29  |
| 35-39     | 58.5                     | 40    | 2036271                   | 1959589  | 2.87                           | 2.04  |
| 40-44     | 64.5                     | 55    | 1984570                   | 1923933  | 3.25                           | 2.86  |
| 45-49     | 130                      | 85.5  | 2286569                   | 2218589  | 5.69                           | 3.85  |
| 50-54     | 182                      | 152.5 | 2123965                   | 2083005  | 8.57                           | 7.32  |
| 55-59     | 345                      | 231.5 | 2137856                   | 2128643  | 16.14                          | 10.88 |
| 60-64     | 406                      | 319.5 | 1721733                   | 1767057  | 23.58                          | 18.08 |
| 65-69     | 497.5                    | 342   | 1153380                   | 1241473  | 43.13                          | 27.55 |
| 70-74     | 833                      | 337   | 859312.3                  | 998886.3 | 96.94                          | 33.74 |
| 75-79     | 522.5                    | 348.5 | 669380.3                  | 924920.5 | 78.06                          | 37.68 |
| 80-84     | 272.5                    | 288.5 | 371498.8                  | 651401   | 73.35                          | 44.29 |
| 85-89     | 150.5                    | 120   | 136960                    | 343085.3 | 109.89                         | 34.98 |
| 90-94     | 31                       | 28.5  | 35735.5                   | 125403.5 | 86.75                          | 22.73 |
| ≥95       | 4                        | 4.5   | 8036.5                    | 34572.75 | 49.77                          | 13.02 |
| Total     | 3575                     | 2417  | 25605652                  | 25713500 | 13.96                          | 9.40  |

\*Incidence rate per 100,000 person-years per year.

**Supplementary Table 4.** Comparison of incidence rates and standardized incidence ratios of retinal artery occlusion among Korean patients with unruptured intracranial aneurysm

| Age Group | Sex Group | Observational group (Group 1) |                     |                 |                | Microsurgical clipping group (Group 2) |                     |                 |                | Endovascular treatment group (Group 3) |                     |                 |                |
|-----------|-----------|-------------------------------|---------------------|-----------------|----------------|----------------------------------------|---------------------|-----------------|----------------|----------------------------------------|---------------------|-----------------|----------------|
|           |           | Observed cases                | Sum of person-years | Incidence rate* | Expected Cases | Observed cases                         | Sum of person-years | Incidence rate* | Expected Cases | Observed cases                         | Sum of person-years | Incidence rate* | Expected Cases |
| 0~4       | Male      | 0.00                          | 29.19               | 0.00            | 0.00           | 0.00                                   | 0.00                | NA              | 0.00           | 0.00                                   | 0.00                | NA              | 0.00           |
| 0~4       | Female    | 0.00                          | 25.79               | 0.00            | 0.00           | 0.00                                   | 0.00                | NA              | 0.00           | 0.00                                   | 0.00                | NA              | 0.00           |
| 5~9       | Male      | 0.00                          | 59.16               | 0.00            | 0.00           | 0.00                                   | 3.66                | 0.00            | 0.00           | 0.00                                   | 1.96                | 0.00            | 0.00           |
| 5~9       | Female    | 0.00                          | 55.66               | 0.00            | 0.00           | 0.00                                   | 0.00                | NA              | 0.00           | 0.00                                   | 0.00                | NA              | 0.00           |
| 10~14     | Male      | 0.00                          | 208.69              | 0.00            | 0.00           | 0.00                                   | 0.03                | 0.00            | 0.00           | 0.00                                   | 0.00                | NA              | 0.00           |
| 10~14     | Female    | 0.00                          | 203.61              | 0.00            | 0.00           | 0.00                                   | 1.64                | 0.00            | 0.00           | 0.00                                   | 20.46               | 0.00            | 0.00           |
| 15~19     | Male      | 0.00                          | 708.02              | 0.00            | 0.01           | 0.00                                   | 9.79                | 0.00            | 0.00           | 0.00                                   | 46.76               | 0.00            | 0.00           |
| 15~19     | Female    | 0.00                          | 695.22              | 0.00            | 0.00           | 0.00                                   | 2.28                | 0.00            | 0.00           | 0.00                                   | 27.55               | 0.00            | 0.00           |
| 20~24     | Male      | 0.00                          | 1431.59             | 0.00            | 0.01           | 0.00                                   | 38.58               | 0.00            | 0.00           | 0.00                                   | 57.21               | 0.00            | 0.00           |
| 20~24     | Female    | 0.00                          | 1530.85             | 0.00            | 0.01           | 0.00                                   | 7.59                | 0.00            | 0.00           | 0.00                                   | 84.47               | 0.00            | 0.00           |
| 25~29     | Male      | 0.00                          | 2379.59             | 0.00            | 0.03           | 0.00                                   | 46.58               | 0.00            | 0.00           | 0.00                                   | 143.84              | 0.00            | 0.00           |
| 25~29     | Female    | 0.00                          | 2754.30             | 0.00            | 0.04           | 0.00                                   | 30.28               | 0.00            | 0.00           | 0.00                                   | 216.00              | 0.00            | 0.00           |
| 30~34     | Male      | 1.00                          | 3933.04             | 25.43           | 0.07           | 0.00                                   | 122.53              | 0.00            | 0.00           | 0.00                                   | 380.88              | 0.00            | 0.01           |
| 30~34     | Female    | 2.00                          | 4205.18             | 47.56           | 0.05           | 0.00                                   | 117.12              | 0.00            | 0.00           | 0.00                                   | 548.37              | 0.00            | 0.01           |
| 35~39     | Male      | 0.00                          | 7496.64             | 0.00            | 0.22           | 0.00                                   | 380.64              | 0.00            | 0.01           | 0.00                                   | 992.55              | 0.00            | 0.03           |
| 35~39     | Female    | 0.00                          | 8507.11             | 0.00            | 0.17           | 0.00                                   | 451.29              | 0.00            | 0.01           | 3.00                                   | 1418.01             | 211.56          | 0.03           |
| 40~44     | Male      | 2.00                          | 9738.31             | 20.54           | 0.32           | 0.00                                   | 631.58              | 0.00            | 0.02           | 1.00                                   | 1623.33             | 61.60           | 0.05           |
| 40~44     | Female    | 2.00                          | 12350.09            | 16.19           | 0.35           | 0.00                                   | 823.88              | 0.00            | 0.02           | 2.00                                   | 2346.98             | 85.22           | 0.07           |
| 45~49     | Male      | 1.00                          | 15379.45            | 6.50            | 0.87           | 0.00                                   | 1283.33             | 0.00            | 0.07           | 1.00                                   | 2658.50             | 37.62           | 0.15           |
| 45~49     | Female    | 1.00                          | 22237.83            | 4.50            | 0.86           | 0.00                                   | 1863.01             | 0.00            | 0.07           | 2.00                                   | 4470.96             | 44.73           | 0.17           |
| 50~54     | Male      | 4.00                          | 19862.57            | 20.14           | 1.70           | 0.00                                   | 1717.27             | 0.00            | 0.15           | 4.00                                   | 3141.13             | 127.34          | 0.27           |



|                                                                        |        |       |           |        |        |      |                                                                        |        |      |                                                                        |          |        |       |
|------------------------------------------------------------------------|--------|-------|-----------|--------|--------|------|------------------------------------------------------------------------|--------|------|------------------------------------------------------------------------|----------|--------|-------|
| 50~54                                                                  | Female | 7.00  | 33129.39  | 21.13  | 2.43   | 0.00 | 2829.23                                                                | 0.00   | 0.21 | 2.00                                                                   | 6563.19  | 30.47  | 0.48  |
| 55~59                                                                  | Male   | 6.00  | 28678.33  | 20.92  | 4.63   | 1.00 | 2506.84                                                                | 39.89  | 0.40 | 4.00                                                                   | 4401.70  | 90.87  | 0.71  |
| 55~59                                                                  | Female | 4.00  | 49806.59  | 8.03   | 5.42   | 0.00 | 4926.69                                                                | 0.00   | 0.54 | 7.00                                                                   | 9234.69  | 75.80  | 1.00  |
| 60~64                                                                  | Male   | 9.00  | 29323.18  | 30.69  | 6.91   | 0.00 | 2181.06                                                                | 0.00   | 0.51 | 2.00                                                                   | 4009.77  | 49.88  | 0.95  |
| 60~64                                                                  | Female | 3.00  | 51576.62  | 5.82   | 9.33   | 1.00 | 5382.08                                                                | 18.58  | 0.97 | 3.00                                                                   | 9361.40  | 32.05  | 1.69  |
| 65~69                                                                  | Male   | 16.00 | 25228.05  | 63.42  | 10.88  | 3.00 | 1618.71                                                                | 185.33 | 0.70 | 4.00                                                                   | 2660.93  | 150.32 | 1.15  |
| 65~69                                                                  | Female | 12.00 | 45374.84  | 26.45  | 12.50  | 1.00 | 4676.11                                                                | 21.39  | 1.29 | 5.00                                                                   | 7976.84  | 62.68  | 2.20  |
| 70~74                                                                  | Male   | 28.00 | 22235.94  | 125.92 | 21.56  | 0.00 | 896.16                                                                 | 0.00   | 0.87 | 4.00                                                                   | 2064.96  | 193.71 | 2.00  |
| 70~74                                                                  | Female | 21.00 | 40557.41  | 51.78  | 13.68  | 0.00 | 3113.13                                                                | 0.00   | 1.05 | 2.00                                                                   | 6477.62  | 30.88  | 2.19  |
| 75~79                                                                  | Male   | 10.00 | 17752.12  | 56.33  | 13.86  | 1.00 | 385.18                                                                 | 259.62 | 0.30 | 0.00                                                                   | 1240.13  | 0.00   | 0.97  |
| 75~79                                                                  | Female | 19.00 | 42682.96  | 44.51  | 16.08  | 0.00 | 1609.10                                                                | 0.00   | 0.61 | 2.00                                                                   | 5083.24  | 39.34  | 1.92  |
| 80~84                                                                  | Male   | 6.00  | 9350.26   | 64.17  | 6.86   | 0.00 | 49.06                                                                  | 0.00   | 0.04 | 1.00                                                                   | 365.99   | 273.23 | 0.27  |
| 80~84                                                                  | Female | 9.00  | 27905.87  | 32.25  | 12.36  | 0.00 | 296.35                                                                 | 0.00   | 0.13 | 1.00                                                                   | 1962.30  | 50.96  | 0.87  |
| 85~89                                                                  | Male   | 4.00  | 3107.48   | 128.72 | 3.41   | 0.00 | 16.89                                                                  | 0.00   | 0.02 | 0.00                                                                   | 62.48    | 0.00   | 0.07  |
| 85~89                                                                  | Female | 2.00  | 10672.29  | 18.74  | 3.73   | 0.00 | 29.02                                                                  | 0.00   | 0.01 | 0.00                                                                   | 398.08   | 0.00   | 0.14  |
| 90~94                                                                  | Male   | 0.00  | 518.72    | 0.00   | 0.45   | 0.00 | 0.00                                                                   | NA     | 0.00 | 0.00                                                                   | 9.28     | 0.00   | 0.01  |
| 90~94                                                                  | Female | 0.00  | 2188.21   | 0.00   | 0.50   | 0.00 | 8.50                                                                   | 0.00   | 0.00 | 0.00                                                                   | 63.53    | 0.00   | 0.01  |
| 95~                                                                    | Male   | 0.00  | 57.60     | 0.00   | 0.03   | 0.00 | 0.00                                                                   | NA     | 0.00 | 0.00                                                                   | 0.00     | NA     | 0.00  |
| 95~                                                                    | Female | 0.00  | 337.88    | 0.00   | 0.04   | 0.00 | 0.00                                                                   | NA     | 0.00 | 0.00                                                                   | 3.22     | 0.00   | 0.00  |
| Total                                                                  |        | 169   | 554275.63 | 30.49  | 149.37 | 7    | 38055.18                                                               | 18.39  | 8.01 | 50                                                                     | 80118.34 | 62.41  | 17.41 |
| Age-, sex-adjusted SIR<br>1.13 (95% CI, 0.93–1.19)<br><i>p</i> = 0.120 |        |       |           |        |        |      | Age-, sex-adjusted SIR<br>0.87 (95% CI, 0.51–1.75)<br><i>p</i> = 0.713 |        |      | Age-, sex-adjusted SIR<br>2.87 (95% CI, 1.24–4.02)<br><i>p</i> < 0.001 |          |        |       |

\*Incidence rate per 100,000 person-years.

**Abbreviations**; NA, not applicable; SIR, standardized incidence ratio; CI, confidence interval.

**Supplementary Table 5.** Case reports and literature review of retinal artery occlusion after the treatment of unruptured intracranial aneurysm

|                                    | Age | Location of aneurysm                                     | Size of aneurysm (mm)               | Technique and device use           | Types of RAO                | Time taken from treatment to vision decrease   | Initial visual acuity | Final visual acuity                         |
|------------------------------------|-----|----------------------------------------------------------|-------------------------------------|------------------------------------|-----------------------------|------------------------------------------------|-----------------------|---------------------------------------------|
| Present study (Patient 1)          | 50s | ICSHA                                                    | 7.1                                 | Simple double catheter             | BRAO                        | 1 day                                          | 1.0                   | 1.0                                         |
| Present study (Patient 2)          | 50s | ICSHA                                                    | 6.3                                 | Balloon-assisted single catheter   | CRAO                        | 1 day                                          | HM                    | FC                                          |
| Present study (Patient 3)          | 50s | ICPCOM                                                   | 4.2                                 | Stent-assisted single catheter     | Retinal arteriole occlusion | 1 day                                          | 0.9                   | 0.3                                         |
| Present study (Patient 4)          | 40s | ICC2                                                     | 6.4                                 | Stent-assisted single catheter     | Retinal arteriole occlusion | 1 day                                          | 1.0                   | 1.0                                         |
| Present study (Patient 5)          | 40s | ICSHA                                                    | 5.4                                 | Balloon-assisted single catheter   | Retinal arteriole occlusion | 1 day                                          | 0.8                   | 1.0                                         |
| Present study (Patient 6)          | 30s | Ophthalmic artery                                        | 5.9                                 | Balloon-assisted single catheter   | Retinal arteriole occlusion | 1 day                                          | 1.0                   | Not assessed                                |
| Present study (Patient 7)          | 40s | ICSHA                                                    | 5.4                                 | Stent-assisted double catheter     | Retinal arteriole occlusion | 1 day                                          | 1.0                   | Not assessed                                |
| Present study (Patient 8)          | 60s | Ophthalmic artery                                        | 3.3                                 | Flow diverter                      | Retinal arteriole occlusion | 1 day                                          | 0.9                   | 0.9                                         |
| Present study (Patient 9)          | 40s | ICC2                                                     | 9.4                                 | Flow diverter                      | Retinal arteriole occlusion | 2 days                                         | 0.2                   | 0.5                                         |
| Present study (Patient 10)         | 50s | ICC2                                                     | 5.4                                 | Flow diverter                      | Retinal arteriole occlusion | 1 day                                          | 0.6                   | 0.9                                         |
| Present study (Patient 11)         | 50s | ICC2                                                     | 3.9                                 | Balloon-assisted flow diverter     | Retinal arteriole occlusion | 1 day                                          | 0.3                   | 0.6                                         |
| Choudhry et al. 2011 <sup>1)</sup> | 40s | Para-ophthalmic artery                                   | 7 x 7 (with 4 mm neck)              | Stent-assisted coil embolization   | BRAO                        | 12 hours                                       | Not described         | Not described                               |
| Choudhry et al. 2014 <sup>2)</sup> | 40s | Paraclinoid artery                                       | 7.1                                 | Not described                      | BRAO                        | Several hours                                  | HM                    | 1.0                                         |
| Castillo et al. 2000 <sup>3)</sup> | 50s | Carotid-ophthalmic artery                                | 4                                   | Coil embolization                  | CRAO                        | 8 hours                                        | HM                    | Not described                               |
| Castillo et al. 2000 <sup>3)</sup> | 10s | Ophthalmic branch of carotid artery                      | 8.6                                 | Coil embolization                  | BRAO                        | 48 hours, right after the cessation of heparin | 1.0                   | Persistent infero-nasal visual field defect |
| Yoo et al. 2016 <sup>4)</sup>      | 50s | Paraclinoid artery                                       | 6.7 (with a bleb)                   | Stent-assisted coil embolization   | CRAO                        | 8 hours                                        | Total blindness       | FC                                          |
| Wang et al. 2019 <sup>5)</sup>     | 50s | Internal carotid artery                                  | 4.2 x 3.8 x 3.2 (with 3.9 mm neck)  | Stent-assisted coil embolization   | CRAO                        | Immediate                                      | FC                    | Not described                               |
| Park et al. 2019 <sup>6)</sup>     | 40s | Internal carotid artery at the ophthalmic artery orifice | 9.3 x 10.6 x 9.6 (with 4.3 mm neck) | Stent-assisted coil embolization   | CRAO                        | Immediate                                      | Not described         | Normal vision                               |
| Elkordy et al. 2016 <sup>7)</sup>  | 60s | Ophthalmic artery                                        | 6.9 x 5.9 x 4.6 (with 6 mm neck)    | Balloon-assisted coil embolization | CRAO                        | 15 minutes                                     | Total blindness       | Normal vision                               |

|                                    |     |                                                |                |                                  |                                     |           |     |                                 |
|------------------------------------|-----|------------------------------------------------|----------------|----------------------------------|-------------------------------------|-----------|-----|---------------------------------|
| Bae et al. 2021 <sup>8)</sup>      | 70s | Anterior communicating artery                  | 6.2            | Coil embolization                | Cilioretinal artery occlusion, BRAO | 1 day     | 0.3 | 0.6                             |
| Blautain et al. 2021 <sup>9)</sup> | 70s | Internal carotid artery near ophthalmic artery | Not described  | Stent-assisted coil embolization | BRAO                                | 2 days    | 1.0 | Not described                   |
| Bonnet et al. 2013 <sup>10)</sup>  | 10s | Internal carotid artery                        | 4.7×4.1×3.5 cm | Coil embolization                | BRAO                                | 2 days    | 1.0 | Persistent supero-nasal scotoma |
| Shin et al. 2018 <sup>11)</sup>    | 40s | Distal internal carotid artery                 | Not described  | Coil embolization                | BRAO                                | Immediate | 1.0 | 0.8                             |

**Abbreviations;** RAO, retinal artery occlusion; ICSHA, internal carotid artery-superior hypophyseal artery; ICPCOM, internal carotid artery-posterior communicating artery; ICC2, C2 segment of internal carotid artery; BRAO, branch retinal artery occlusion; CRAO, central retinal artery occlusion; HM, hand motion; FC, finger count.

References; 1) Chowdhry S, Sharma J, Blackham K. E-001 Partial central retinal artery occlusion following para-ophthalmic artery embolization: a case report. *Journal of NeuroInterventional Surgery*. 2011;3:A31-A31.

2) Choudhry N, Brucker AJ. Branch retinal artery occlusion after coil embolization of a paraclinoid aneurysm. *Ophthalmic Surg Lasers Imaging Retina*. 2014;45 Online:e26-e28.

3) Castillo B Jr, De Alba F, Thornton J, DeBrun G, Pulido J. Retinal artery occlusion following coil embolization of carotid-ophthalmic aneurysms. *Arch Ophthalmol*. 2000;118:851-852.

4) Yoo M, Jin SC, Kim HY, Choi BS. Intra-arterial Thrombolysis for Central Retinal Artery Occlusion after the Coil Embolization of Paraclinoid Aneurysm. *J Cerebrovasc Endovasc Neurosurg*. 2016;18:369-372.

5)Wang YL, Hui YN, Chen R, Jin YY, Tao J, Zhou YM. Central retinal artery occlusion after endovascular coil embolization for internal carotid artery aneurysm. *Int J Ophthalmol*. 2019;12:520-522.

6) Park H, Nakagawa I, Yokoyama S, et al. Central Retinal Artery Thromboembolism without Ophthalmic Artery Occlusion During Stent-Assisted Coil Embolization of Ophthalmic Artery Aneurysm. *World Neurosurg*. 2019;121:77-82.

7) Elkordy AM, Sato K, Inoue Y, et al. Central Retinal Artery Occlusion after the Endovascular Treatment of Unruptured Ophthalmic Artery Aneurysm: A Case Report and a Literature Review. *NMC Case Rep J*. 2016;3:71-74.

8) Bae H, Kang T, Jeong DE, Shim K, Kang M. Cilioretinal Artery Occlusion after Endovascular Coil Embolization for Anterior Communicating Artery. *Brain Sci*. 2021;11:542.

9) Blautain B, Leleu I, Jabbour E, Mer YL. Ischemic stroke and retinal artery occlusion after carotid aneurysm embolization. *Radiol Case Rep*. 2021;16:701-703.

10) Bonnet S, Ellis B, Carpenter JS, Nguyen J. Delayed Branch Retinal Artery Occlusion and Partial Oculomotor Nerve Palsy Following Coiling of a Giant Intracavernous Carotid Artery Aneurysm. *J Ocular Biol*. 2013;1: 4.

11) Shin SH, Park SP, Kim YK. Multiple small branch retinal arteriolar occlusions following coil embolization of an internal carotid artery aneurysm. *Indian J Ophthalmol*. 2018;66:1208-1210.

Supplementary Figure Legend

**Supplementary Figure 1.** Incidence of retinal artery occlusion after the diagnosis of unruptured intracranial aneurysm in untreated patients (A), patients treated with microsurgical clipping (B), and patients treated with endovascular treatment (C)

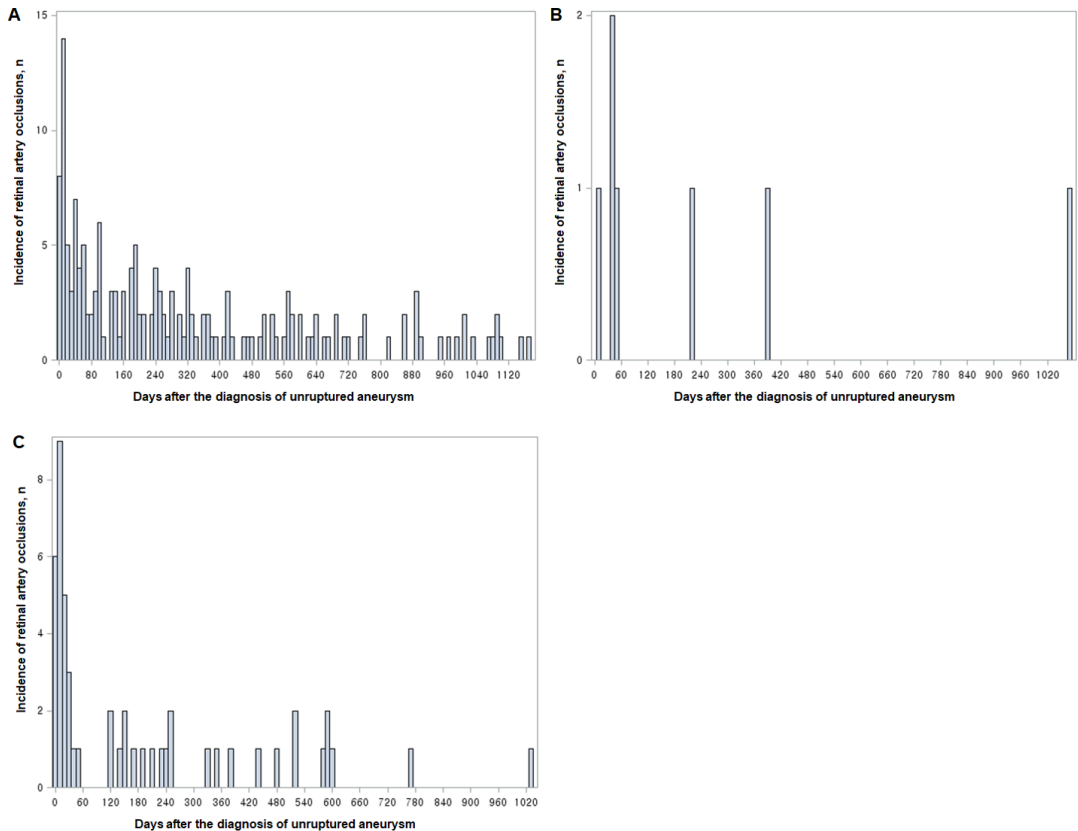

**Supplementary Figure 2.** Representative cases of retinal artery occlusion after endovascular treatment procedure for unruptured intracranial aneurysm. Retinal opacity of the posterior fundus and diffuse hyper-reflective bands along the inner nuclear layer and outer nuclear layer (paracentral acute middle maculopathy-like lesions) were prominent in all cases, reflecting retinal ischemia in the affected areas. Multifocal arteriolar occlusive lesions observed in patients were likely to be caused by procedure-related thrombosis.

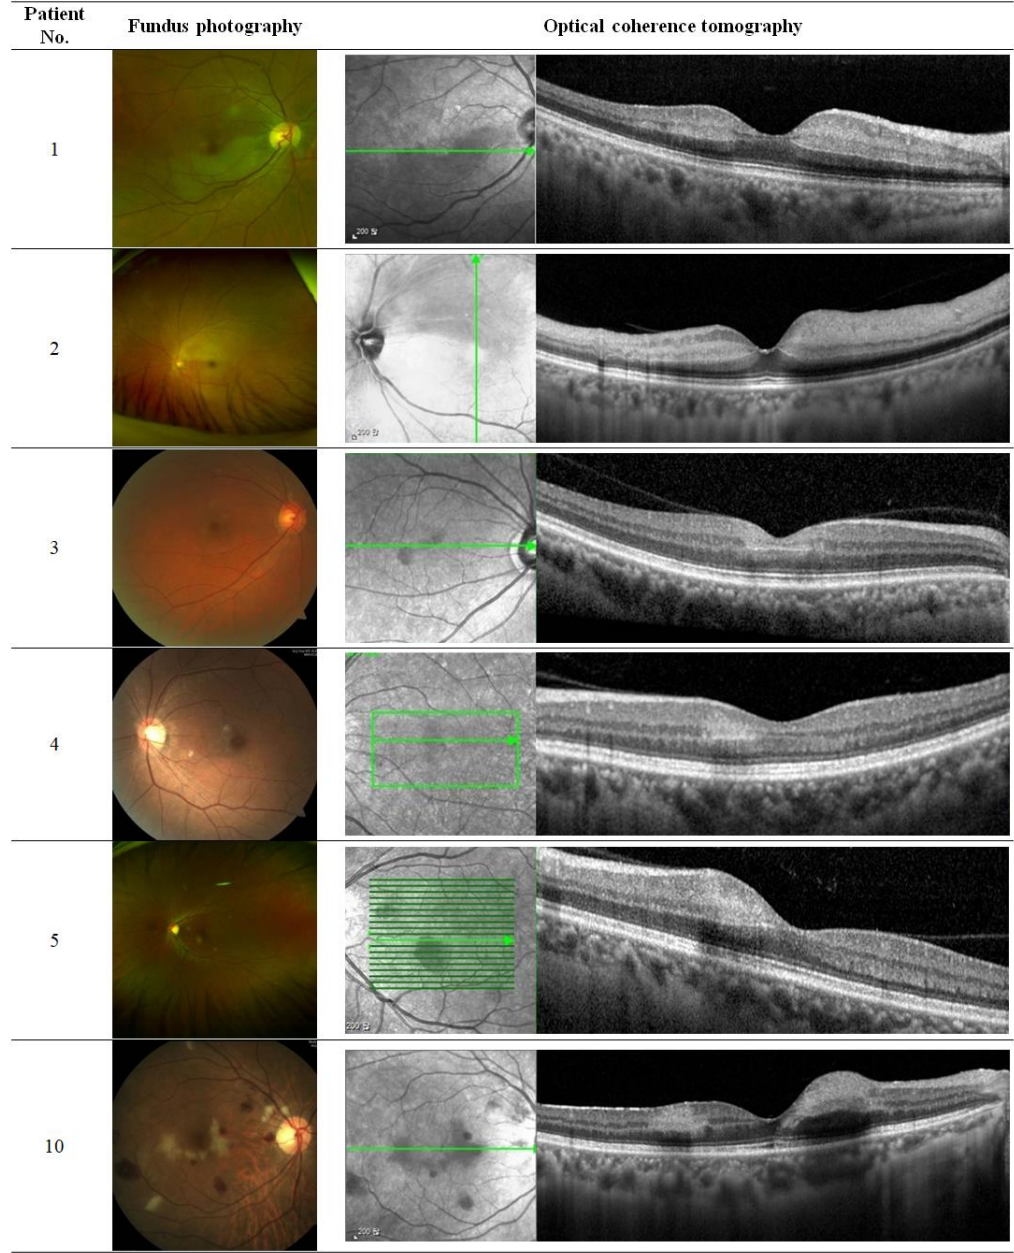

Supplement: inline-supplementary-material-1 [file inline-supplementary-material-1.pdf]
